# Supplementary material
Source: Springer Nature journal article supplement (https://www.springermedizin.de/resource/supplementary/12891_2013_1945_MOESM1_ESM.pdf/9508860)
Supplement: MOESM1 [file 9508860]

Included TKAs  
n = 198

CON  
n = 95  
Operated 2006/10/05-2008/08/07

Radiograph only  
n = 24

Questionnaire only  
n = 5

Radiograph and questionnaire  
n = 66

CAOS  
n = 103  
Operated 2006/11/28-2008/12/30

Radiograph only  
n = 10

Questionnaire only  
n = 4

Radiograph and  
questionnaire  
n = 89
